# Supplementary material for: Syntheses, structures, luminescent sensor, and magnetism of a series of coordination polymers constructed by 3-carboxy-1-(4′-carboxy-benzyl)-2-oxidopyridinium
Source: Royal Society of Chemistry journal article supplement (doi:10.1039/c3ce40850g), 2013-01-01
Supplement: c3ce40850g.pdf [file c3ce40850g.pdf]

Supplementary Material (ESI) for CrystEngComm

**Syntheses, structures, luminescent sensor, and magnetism of a series  
of coordination polymers constructed by  
3-carboxy-1-(4'-carboxy-benzyl)-2-oxidopyridinium**

**Na Xu, Jin Yang,\* Yuan-Chun He, Ying-Ying Liu, and Jian-Fang Ma\***

*Key Lab of Polyoxometalate Science, Department of Chemistry, Northeast Normal University, Changchun 130024, People's Republic of China*

\* Correspondence authors

E-mail: yangjinnenu@yahoo.com.cn (J. Yang)

E-mail: majf247@yahoo.com (J.-F. Ma)

Fax: +86-431-85098620 (J.-F. Ma)

**Table S1a.** Selected bond distances (Å) and angles (°) for **1**.

|                                              |            |                                              |           |
|----------------------------------------------|------------|----------------------------------------------|-----------|
| Co(1)-O(1) <sup>#1</sup>                     | 2.063(3)   | Co(1)-O(2W)                                  | 2.109(4)  |
| Co(1)-O(4)                                   | 2.072(3)   | Co(1)-O(1W)                                  | 2.116(3)  |
| Co(1)-O(2) <sup>#1</sup>                     | 2.080(3)   | Co(1)-O(5) <sup>#2</sup>                     | 2.123(3)  |
| O(1) <sup>#1</sup> -Co(1)-O(4)               | 89.53(13)  | O(1) <sup>#1</sup> -Co(1)-O(2) <sup>#1</sup> | 85.52(11) |
| O(4)-Co(1)-O(2) <sup>#1</sup>                | 96.38(13)  | O(1) <sup>#1</sup> -Co(1)-O(2W)              | 98.80(13) |
| O(4)-Co(1)-O(2W)                             | 171.00(13) | O(2) <sup>#1</sup> -Co(1)-O(2W)              | 87.71(13) |
| O(1) <sup>#1</sup> -Co(1)-O(1W)              | 172.53(12) | O(4)-Co(1)-O(1W)                             | 88.11(13) |
| O(2) <sup>#1</sup> -Co(1)-O(1W)              | 87.69(11)  | O(2W)-Co(1)-O(1W)                            | 84.04(13) |
| O(1) <sup>#1</sup> -Co(1)-O(5) <sup>#2</sup> | 89.68(11)  | O(4)-Co(1)-O(5) <sup>#2</sup>                | 94.51(12) |
| O(2) <sup>#1</sup> -Co(1)-O(5) <sup>#2</sup> | 168.06(12) | O(2W)-Co(1)-O(5) <sup>#2</sup>               | 82.21(12) |
| O(1W)-Co(1)-O(5) <sup>#2</sup>               | 97.57(12)  |                                              |           |

**Table S1b.** Hydrogen bonds for **1** (Å and °).

| D-H...A                           | d (D-H)   | d (H...A) | d (D...A) | < (DHA) |
|-----------------------------------|-----------|-----------|-----------|---------|
| O(1W)-H(1A)...O(5)                | 0.899(10) | 1.88(2)   | 2.728(5)  | 156(5)  |
| O(1W)-H(1A)...O(2W) <sup>#3</sup> | 0.899(10) | 2.43(4)   | 3.003(4)  | 122(4)  |
| O(1W)-H(1B)...O(3) <sup>#4</sup>  | 0.900(10) | 1.982(18) | 2.841(5)  | 159(4)  |
| O(2W)-H(2A)...O(2) <sup>#5</sup>  | 0.898(10) | 1.90(3)   | 2.717(4)  | 151(5)  |
| O(2W)-H(2B)...O(3) <sup>#4</sup>  | 0.896(10) | 1.92(3)   | 2.718(4)  | 148(5)  |

Symmetry transformations used to generate equivalent atoms: <sup>#1</sup> -x,-y,-z; <sup>#2</sup> x-1,y,z; <sup>#3</sup> x+1,y,z; <sup>#4</sup> x,y,z-1; <sup>#5</sup> -x-1,-y,-z.

**Table S2a.** Selected bond distances (Å) and angles (°) for **2**.

|                               |           |                               |            |
|-------------------------------|-----------|-------------------------------|------------|
| Ni(1)-O(2)                    | 1.998(4)  | Ni(1)-O(2W)                   | 2.058(4)   |
| Ni(1)-O(1)                    | 2.036(4)  | Ni(1)-O(3W)                   | 2.069(4)   |
| Ni(1)-O(5) <sup>#1</sup>      | 2.050(4)  | Ni(1)-O(1W)                   | 2.102(4)   |
| O(2)-Ni(1)-O(1)               | 88.18(16) | O(2)-Ni(1)-O(5) <sup>#1</sup> | 176.24(17) |
| O(1)-Ni(1)-O(5) <sup>#1</sup> | 88.09(16) | O(2)-Ni(1)-O(2W)              | 90.91(19)  |

|                                 |           |                                 |            |
|---------------------------------|-----------|---------------------------------|------------|
| O(1)-Ni(1)-O(2W)                | 92.29(17) | O(5) <sup>#1</sup> -Ni(1)-O(2W) | 89.73(17)  |
| O(2)-Ni(1)-O(3W)                | 91.68(16) | O(1)-Ni(1)-O(3W)                | 176.93(17) |
| O(5) <sup>#1</sup> -Ni(1)-O(3W) | 92.02(16) | O(2W)-Ni(1)-O(3W)               | 90.77(17)  |
| O(2)-Ni(1)-O(1W)                | 89.4(2)   | O(1)-Ni(1)-O(1W)                | 88.92(17)  |
| O(5) <sup>#1</sup> -Ni(1)-O(1W) | 90.03(19) | O(2W)-Ni(1)-O(1W)               | 178.76(19) |
| O(3W)-Ni(1)-O(1W)               | 88.02(17) |                                 |            |

**Table S2b.** Hydrogen bonds for **2** (Å and °).

| D-H...A                          | d (D-H)   | d (H...A) | d (D...A) | < (DHA) |
|----------------------------------|-----------|-----------|-----------|---------|
| O(3W)-H(3B)...O(4) <sup>#1</sup> | 0.903(10) | 1.85(3)   | 2.699(6)  | 156(7)  |
| O(3W)-H(3A)...O(3) <sup>#3</sup> | 0.901(10) | 1.79(2)   | 2.669(6)  | 165(7)  |

Symmetry transformations used to generate equivalent atoms: <sup>#1</sup> x,-y+1/2,z+1/2; <sup>#2</sup> x,-y+1/2,z-1/2; <sup>#3</sup> -x+2,-y+1,-z+2.

**Table S3.** Selected bond distances (Å) and angles (°) for **3**.

|                                              |          |                                              |           |
|----------------------------------------------|----------|----------------------------------------------|-----------|
| Cu(1)-O(5) <sup>#1</sup>                     | 1.904(4) | Cu(1)-O(2)                                   | 1.922(5)  |
| Cu(1)-O(1)                                   | 1.943(4) | Cu(1)-O(3) <sup>#2</sup>                     | 1.977(4)  |
| Cu1-O2 <sup>#2</sup>                         | 2.656(4) |                                              |           |
| O(5) <sup>#1</sup> -Cu(1)-O(2)               | 170.5(2) | O(5) <sup>#1</sup> -Cu(1)-O(1)               | 90.9(2)   |
| O(2)-Cu(1)-O(1)                              | 91.1(2)  | O(5) <sup>#1</sup> -Cu(1)-O(3) <sup>#2</sup> | 93.6(2)   |
| O(2)-Cu(1)-O(3) <sup>#2</sup>                | 86.0(2)  | O(1)-Cu(1)-O(3) <sup>#2</sup>                | 169.5(3)  |
| O(2) <sup>#2</sup> -Cu(1)-O(3) <sup>#2</sup> | 54.22(1) | O(2) <sup>#2</sup> -Cu(1)-O(1)               | 115.3(2)  |
| O(2) <sup>#2</sup> -Cu(1)-O(2)               | 78.41(2) | O(2) <sup>#2</sup> -Cu(1)-O(5) <sup>#1</sup> | 109.05(2) |

Symmetry transformations used to generate equivalent atoms: <sup>#1</sup> -x,y-1/2,-z+1; <sup>#2</sup> -x,y-1/2,-z+2; <sup>#3</sup> -x,y+1/2,-z+2; <sup>#4</sup> -x,y+1/2,-z+1.

**Table S4.** Selected bond distances (Å) and angles (°) for **4**.

|                          |          |                          |          |
|--------------------------|----------|--------------------------|----------|
| Cd(1)-O(4) <sup>#1</sup> | 2.209(3) | Cd(1)-O(1)               | 2.263(3) |
| Cd(1)-O(2)               | 2.275(3) | Cd(1)-O(2) <sup>#2</sup> | 2.279(3) |

|                                              |            |                                              |            |
|----------------------------------------------|------------|----------------------------------------------|------------|
| Cd(1)-O(5) <sup>#3</sup>                     | 2.282(3)   | Cd(1)-O(3) <sup>#4</sup>                     | 2.311(3)   |
| O(4) <sup>#1</sup> -Cd(1)-O(1)               | 94.17(13)  | O(4) <sup>#1</sup> -Cd(1)-O(2)               | 171.99(12) |
| O(1)-Cd(1)-O(2)                              | 78.44(10)  | O(4) <sup>#1</sup> -Cd(1)-O(2) <sup>#2</sup> | 90.78(13)  |
| O(1)-Cd(1)-O(2) <sup>#2</sup>                | 175.01(11) | O(2)-Cd(1)-O(2) <sup>#2</sup>                | 96.58(14)  |
| O(4) <sup>#1</sup> -Cd(1)-O(5) <sup>#3</sup> | 91.67(13)  | O(1)-Cd(1)-O(5) <sup>#3</sup>                | 89.53(13)  |
| O(2)-Cd(1)-O(5) <sup>#3</sup>                | 91.36(12)  | O(2) <sup>#2</sup> -Cd(1)-O(5) <sup>#3</sup> | 90.97(12)  |
| O(4) <sup>#1</sup> -Cd(1)-O(3) <sup>#4</sup> | 87.51(15)  | O(1)-Cd(1)-O(3) <sup>#4</sup>                | 81.17(12)  |
| O(2)-Cd(1)-O(3) <sup>#4</sup>                | 88.30(13)  | O(2) <sup>#2</sup> -Cd(1)-O(3) <sup>#4</sup> | 98.43(11)  |
| O(5) <sup>#3</sup> -Cd(1)-O(3) <sup>#4</sup> | 170.57(13) |                                              |            |

Symmetry transformations used to generate equivalent atoms: <sup>#1</sup> x-y+1/3,-y+2/3,-z+1/6; <sup>#2</sup> y+1,-x+y+1,-z; <sup>#3</sup> x-1/3,x-y-2/3,z-1/6; <sup>#4</sup> -x+y+2,-x+1,z; <sup>#5</sup> x-y,x-1,-z; <sup>#6</sup> -y+1,x-y-1,z; <sup>#7</sup> x+1/3,x-y-1/3,z+1/6.

**Table S5.** Selected bond distances (Å) and angles (°) for **5**.

|                                              |            |                                              |            |
|----------------------------------------------|------------|----------------------------------------------|------------|
| Mn(1)-O(4) <sup>#1</sup>                     | 2.118(5)   | Mn(1)-O(1) <sup>#2</sup>                     | 2.158(5)   |
| Mn(1)-O(5)                                   | 2.177(5)   | Mn(1)-O(2) <sup>#2</sup>                     | 2.182(5)   |
| Mn(1)-O(2) <sup>#3</sup>                     | 2.189(4)   | Mn(1)-O(3) <sup>#4</sup>                     | 2.203(5)   |
| O(4) <sup>#1</sup> -Mn(1)-O(1) <sup>#2</sup> | 93.3(2)    | O(4) <sup>#1</sup> -Mn(1)-O(5)               | 91.3(2)    |
| O(1) <sup>#2</sup> -Mn(1)-O(5)               | 90.1(2)    | O(4) <sup>#1</sup> -Mn(1)-O(2) <sup>#2</sup> | 173.92(19) |
| O(1) <sup>#2</sup> -Mn(1)-O(2) <sup>#2</sup> | 81.27(18)  | O(5)-Mn(1)-O(2) <sup>#2</sup>                | 91.53(19)  |
| O(4) <sup>#1</sup> -Mn(1)-O(2) <sup>#3</sup> | 89.9(2)    | O(1) <sup>#2</sup> -Mn(1)-O(2) <sup>#3</sup> | 176.0(2)   |
| O(5)-Mn(1)-O(2) <sup>#3</sup>                | 92.25(18)  | O(2) <sup>#2</sup> -Mn(1)-O(2) <sup>#3</sup> | 95.4(2)    |
| O(4) <sup>#1</sup> -Mn(1)-O(3) <sup>#4</sup> | 87.8(2)    | O(1) <sup>#2</sup> -Mn(1)-O(3) <sup>#4</sup> | 82.12(19)  |
| O(5)-Mn(1)-O(3) <sup>#4</sup>                | 172.12(19) | O(2) <sup>#2</sup> -Mn(1)-O(3) <sup>#4</sup> | 88.7(2)    |
| O(2) <sup>#3</sup> -Mn(1)-O(3) <sup>#4</sup> | 95.58(18)  |                                              |            |

Symmetry transformations used to generate equivalent atoms: <sup>#1</sup> y+1,-x+y+1,-z; <sup>#2</sup> x+1/3,x-y-1/3,z+1/6; <sup>#3</sup> x-y+2/3,-y+1/3,-z-1/6; <sup>#4</sup> -y+4/3,-x+2/3,z+1/6; <sup>#5</sup> x-1/3,x-y-2/3,z-1/6; <sup>#6</sup> x-y-1/3,-y+1/3,-z-1/6; <sup>#7</sup> -y+2/3,-x+4/3,z-1/6; <sup>#8</sup> x-y,x-1,-z.

**Table S6.** Selected bond distances (Å) and angles (°) for **6**.

|                                              |            |                                 |            |
|----------------------------------------------|------------|---------------------------------|------------|
| Cu(1)-O(1)                                   | 1.9449(15) | Cu(1)-O(2)                      | 1.9624(15) |
| Cu(1)-O(5) <sup>#1</sup>                     | 1.9854(15) | Cu(1)-N(2)                      | 1.9992(17) |
| Cu(1)-O(1W)                                  | 2.348(2)   | Cu(1)-O(4) <sup>#1</sup>        | 2.4952(19) |
| O(1)-Cu(1)-O(2)                              | 90.68(6)   | O(1)-Cu(1)-O(5) <sup>#1</sup>   | 90.56(7)   |
| O(2)-Cu(1)-O(5) <sup>#1</sup>                | 158.41(7)  | O(1)-Cu(1)-N(2)                 | 170.07(7)  |
| O(2)-Cu(1)-N(2)                              | 92.46(7)   | O(5) <sup>#1</sup> -Cu(1)-N(2)  | 89.98(7)   |
| O(1)-Cu(1)-O(1W)                             | 86.11(7)   | O(2)-Cu(1)-O(1W)                | 98.77(7)   |
| O(5) <sup>#1</sup> -Cu(1)-O(1W)              | 102.82(7)  | N(2)-Cu(1)-O(1W)                | 84.11(7)   |
| O(1)-Cu(1)-O(4) <sup>#1</sup>                | 95.67(8)   | O(2)-Cu(1)-O(4) <sup>#1</sup>   | 100.67(7)  |
| O(5) <sup>#1</sup> -Cu(1)-O(4) <sup>#1</sup> | 57.77(7)   | O(4) <sup>#1</sup> -Cu(1)-O(1W) | 160.44(7)  |
| N(2)-Cu(1)-O(4) <sup>#1</sup>                | 93.00(8)   |                                 |            |

Symmetry transformations used to generate equivalent atoms: <sup>#1</sup> -x+1,-y,-z+1; <sup>#2</sup> -x+2,-y+1,-z+1.

**Table S7.** Selected bond distances (Å) and angles (°) for **7**.

|                                              |            |                                              |            |
|----------------------------------------------|------------|----------------------------------------------|------------|
| Cd(1)-O(4)                                   | 2.230(4)   | Cd(1)-O(1W)                                  | 2.270(3)   |
| Cd(1)-O(2) <sup>#1</sup>                     | 2.292(3)   | Cd(1)-O(2) <sup>#2</sup>                     | 2.317(2)   |
| Cd(1)-O(1) <sup>#2</sup>                     | 2.334(3)   | Cd(1)-N(2)                                   | 2.363(3)   |
| O(4)-Cd(1)-O(1W)                             | 174.45(12) | O(4)-Cd(1)-O(2) <sup>#1</sup>                | 95.25(12)  |
| O(1W)-Cd(1)-O(2) <sup>#1</sup>               | 89.85(11)  | O(4)-Cd(1)-O(2) <sup>#2</sup>                | 96.19(11)  |
| O(1W)-Cd(1)-O(2) <sup>#2</sup>               | 87.45(10)  | O(2) <sup>#1</sup> -Cd(1)-O(2) <sup>#2</sup> | 72.17(10)  |
| O(4)-Cd(1)-O(1) <sup>#2</sup>                | 87.69(12)  | O(1W)-Cd(1)-O(1) <sup>#2</sup>               | 89.34(11)  |
| O(2) <sup>#1</sup> -Cd(1)-O(1) <sup>#2</sup> | 145.68(9)  | O(2) <sup>#2</sup> -Cd(1)-O(1) <sup>#2</sup> | 73.52(9)   |
| O(4)-Cd(1)-N(2)                              | 80.32(13)  | O(1W)-Cd(1)-N(2)                             | 94.87(12)  |
| O(2) <sup>#1</sup> -Cd(1)-N(2)               | 126.88(11) | O(2) <sup>#2</sup> -Cd(1)-N(2)               | 160.73(11) |
| O(1) <sup>#2</sup> -Cd(1)-N(2)               | 87.36(11)  |                                              |            |

Symmetry transformations used to generate equivalent atoms: <sup>#1</sup> x,y,z+1; <sup>#2</sup> -x+1,-y,-z+1; <sup>#3</sup> -x+2,-y,-z+1; <sup>#4</sup> x,y,z-1.

**Table S8.** Selected bond distances (Å) and angles (°) for **8**.

|                                 |            |                                |            |
|---------------------------------|------------|--------------------------------|------------|
| Mn(1)-O(5) <sup>#1</sup>        | 2.0824(17) | Mn(1)-O(2)                     | 2.1373(16) |
| Mn(1)-O(1)                      | 2.1843(14) | Mn(1)-O(1W)                    | 2.2024(17) |
| Mn(1)-N(2)                      | 2.2825(19) | Mn(1)-N(3)                     | 2.296(2)   |
| O(5) <sup>#1</sup> -Mn(1)-O(1)  | 94.52(6)   | O(2)-Mn(1)-O(1)                | 81.16(6)   |
| O(5) <sup>#1</sup> -Mn(1)-O(1W) | 84.61(7)   | O(2)-Mn(1)-O(1W)               | 102.16(7)  |
| O(1)-Mn(1)-O(1W)                | 176.67(6)  | O(5) <sup>#1</sup> -Mn(1)-N(2) | 98.00(7)   |
| O(2)-Mn(1)-N(2)                 | 153.08(7)  | O(1)-Mn(1)-N(2)                | 78.92(6)   |
| O(1W)-Mn(1)-N(2)                | 98.00(7)   | O(5) <sup>#1</sup> -Mn(1)-N(3) | 168.28(7)  |
| O(2)-Mn(1)-N(3)                 | 90.25(7)   | O(1)-Mn(1)-N(3)                | 87.69(6)   |
| O(1W)-Mn(1)-N(3)                | 92.52(7)   | N(2)-Mn(1)-N(3)                | 71.10(7)   |

**Table S8b.** Hydrogen bonds for **8** (Å and °).

| D-H...A                          | d (D-H)   | d (H...A) | d (D...A) | < (DHA) |
|----------------------------------|-----------|-----------|-----------|---------|
| O(1W)-H(1B)...O(3) <sup>#3</sup> | 0.890(10) | 1.967(14) | 2.820(2)  | 160(3)  |
| O(1W)-H(1B)...O(2) <sup>#3</sup> | 0.890(10) | 2.50(2)   | 3.232(2)  | 140(2)  |
| O(1W)-H(1A)...O(3) <sup>#4</sup> | 0.891(10) | 1.989(12) | 2.863(2)  | 167(3)  |

Symmetry transformations used to generate equivalent atoms: <sup>#1</sup> x,y+1,z; <sup>#2</sup> x,y-1,z; <sup>#3</sup> -x,-y+1,-z; <sup>#4</sup> x+1,y,z.

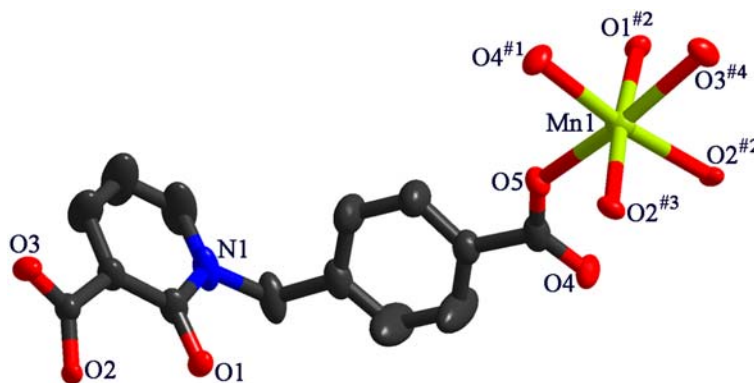

**Fig. S1.** Coordination environment of the Mn(II) cation in **5**. Symmetry codes: <sup>#1</sup> y+1, -x+y+1, -z; <sup>#2</sup> x+1/3, x-y-1/3, z+1/6; <sup>#3</sup> x-y+2/3, -y+1/3, -z-1/6; <sup>#4</sup> -y+4/3, -x+2/3,

$z+1/6$ .

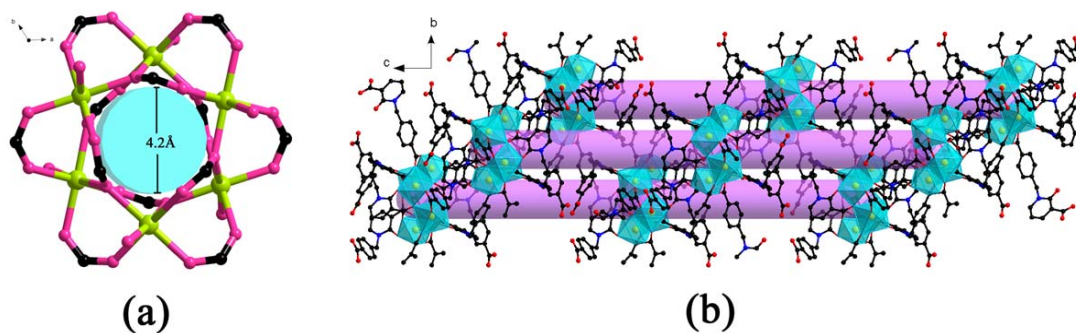

**Fig. S2.** (a) The diameter of the channel is about 4.2Å. (b) View of the 1D cylindrical channel running along the *c* axis shown.

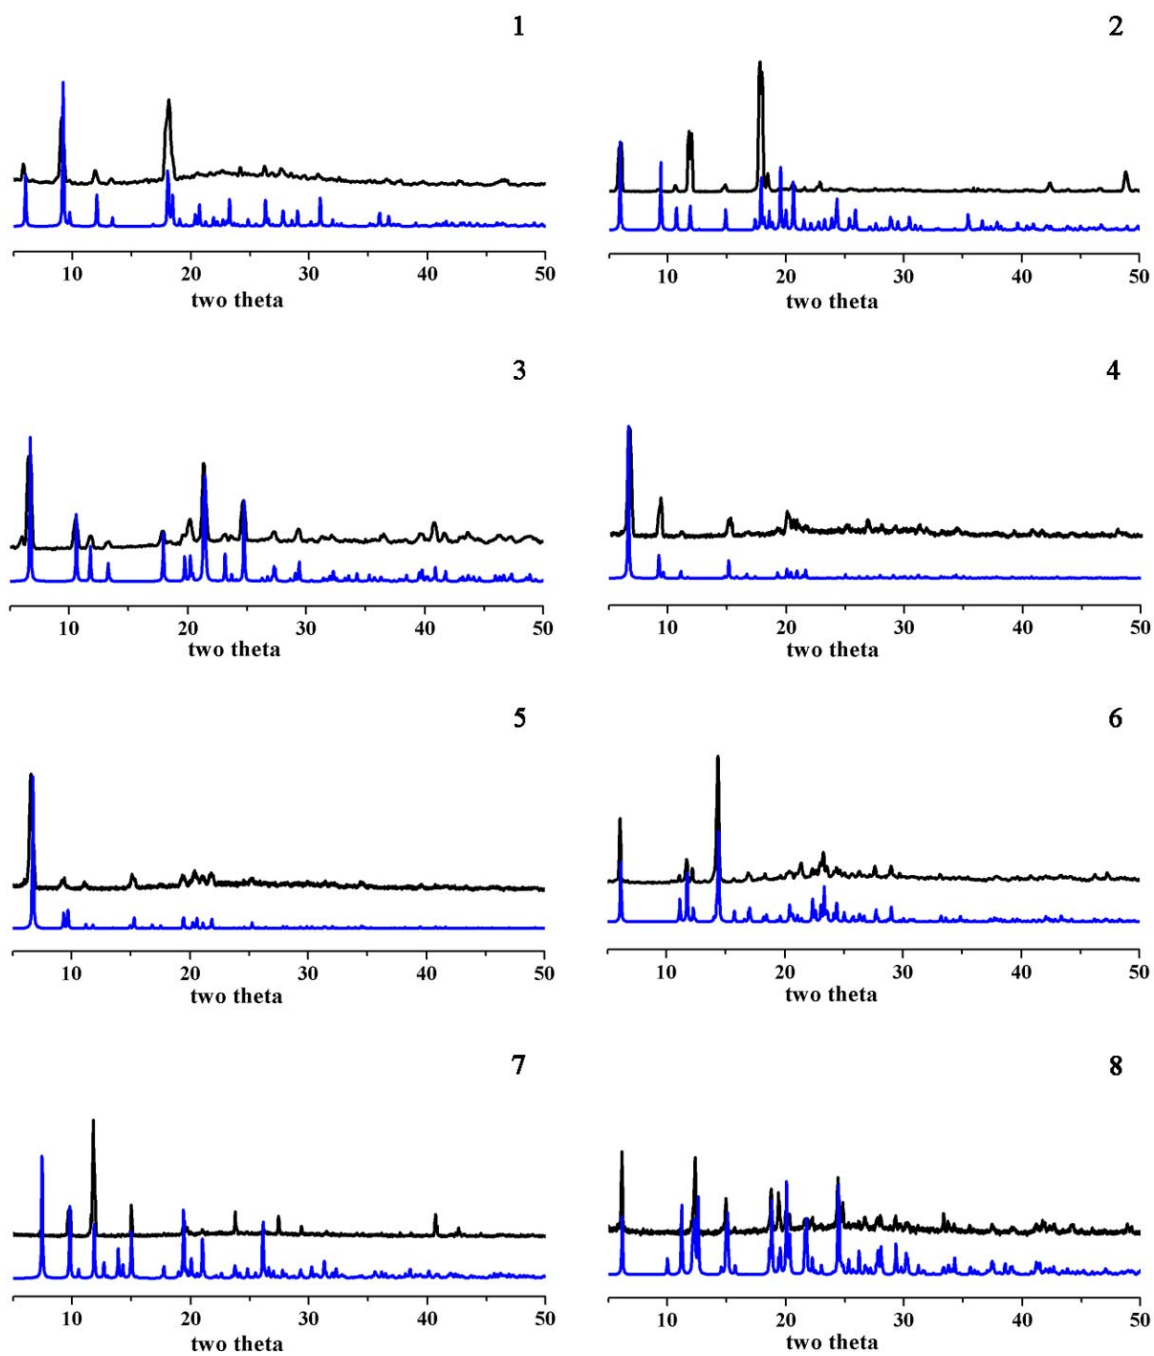

**Fig. S3.** Simulated (blue) and experimental (black) PXRD patterns of 1–8.



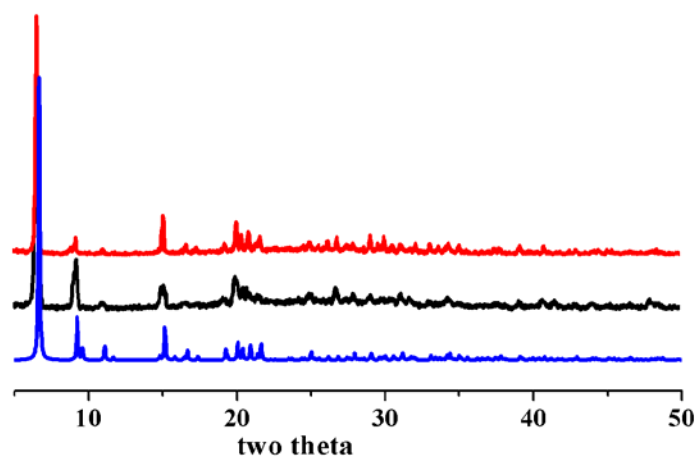

**Fig. S4.** Simulated (blue), experimental (black) and anhydrous compound **4** (red) PXRD patterns.

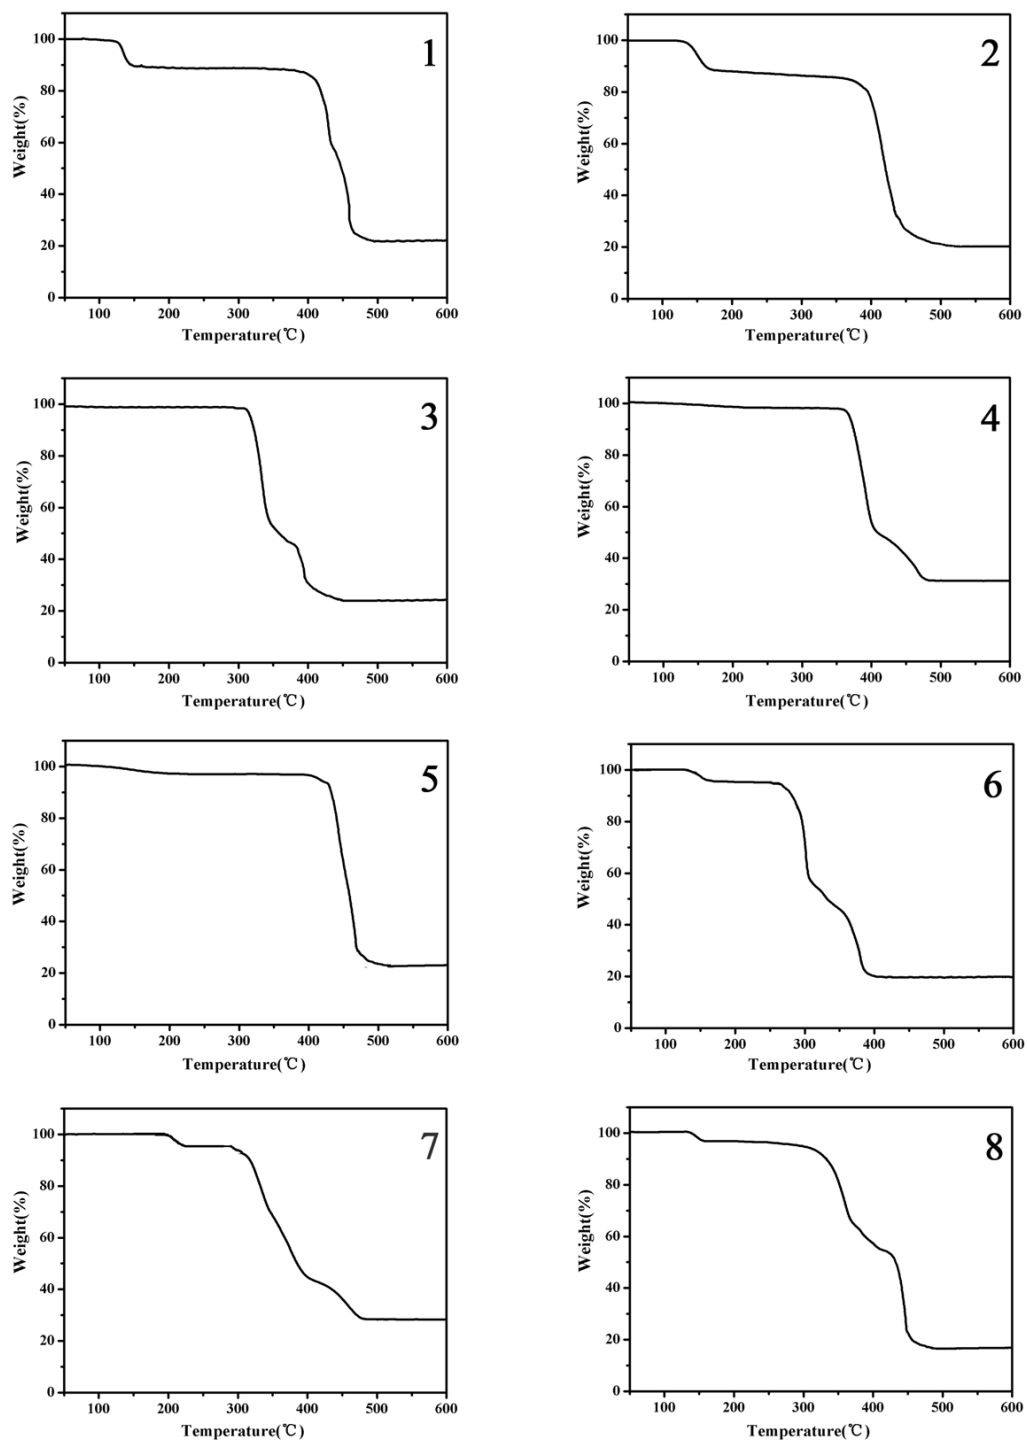

**Fig. S5.** The TGA curves of compounds 1-8.
